# Supplementary material for: Effects of Co-Culture Media on Hepatic Differentiation of hiPSC with or without HUVEC Co-Culture
Source: MDPI journal article supplement (doi:10.3390/ijms18081724), 2017-08-07
Supplement: s1 [file s1]

**Supplementary Table S1.** Percentages of cells positive for stage-specific markers in mono-cultures of human umbilical vein endothelial cells (HUVEC), mean  $\pm$  standard deviation. n.d. = not detected

|                                | PECAM1      | HNF4A | KRT18 | VWF         |
|--------------------------------|-------------|-------|-------|-------------|
| <b>EGM complete</b>            | 91 $\pm$ 6  | n.d.  | n.d.  | 79 $\pm$ 5  |
| <b>HCM-I + EGM complete</b>    | 71 $\pm$ 23 | n.d.  | n.d.  | 83 $\pm$ 14 |
| <b>HCM-I + EGM Supplements</b> | 73 $\pm$ 13 | n.d.  | n.d.  | 62 $\pm$ 12 |

**Supplementary Table S2.** Percentages of cells positive for stage-specific markers in cultures of human induced pluripotent stem cells (hiPSC), mean  $\pm$  standard deviation. n.d. = not detected

|                                        | POU5F1     | KRT18       | HNF4A       | PECAM1      |
|----------------------------------------|------------|-------------|-------------|-------------|
| <b>Undiff. hiPSC</b>                   | 99 $\pm$ 3 | n.d.        | n.d.        | n.d.        |
| <b>HCM-I/II</b>                        | n.d.       | 80 $\pm$ 6  | 60 $\pm$ 30 | n.d.        |
| <b>HCM-I + EGM complete</b>            | n.d.       | 47 $\pm$ 14 | 28 $\pm$ 19 | n.d.        |
| <b>HCM-I + EGM supplements</b>         | n.d.       | 49 $\pm$ 14 | 20 $\pm$ 15 | n.d.        |
| <b>HCM-I + EGM complete +HUVEC</b>     | n.d.       | 60 $\pm$ 17 | 11 $\pm$ 6  | 37 $\pm$ 17 |
| <b>HCM-I + EGM supplements + HUVEC</b> | n.d.       | 38 $\pm$ 10 | 16 $\pm$ 15 | 23 $\pm$ 26 |

**Supplementary Table 3.** Compositions of basal media as provided by the manufacturers

| Component                                                            | HCM (Lonza)                       | EGM complete (PromoCell) |
|----------------------------------------------------------------------|-----------------------------------|--------------------------|
| Glucose                                                              | 10 mM                             | 5.6 mM                   |
| FCS / BSA                                                            | BSA: fatty acid free <sup>1</sup> | FCS: 0.02 ml/ml          |
| Bovine hypothalamic extract (rich in endothelial cell growth factor) | /                                 | 0.004 ml/ml              |
| Epidermal Growth Factor (recombinant human)                          | Included <sup>1</sup>             | 0.1 ng/ml                |
| Basic Fibroblast growth factor (recombinant human)                   | /                                 | 1 ng/ml                  |
| Heparin                                                              | /                                 | 90 µg/ml                 |
| Hydrocortisone                                                       | Included <sup>1</sup>             | 1µg/ml                   |
| Insulin                                                              | Included <sup>1</sup>             | /                        |
| Transferrin                                                          | Included <sup>1</sup>             | /                        |
| Ascorbic acid                                                        | Included <sup>1</sup>             | /                        |

<sup>1</sup> Concentrations of supplements not published
